# Supplementary figures and images for: Deep Learning with Neuroimaging and Genomics in Alzheimer’s Disease
Source: MDPI journal article supplement (doi:10.3390/ijms22157911), 2021-07-24

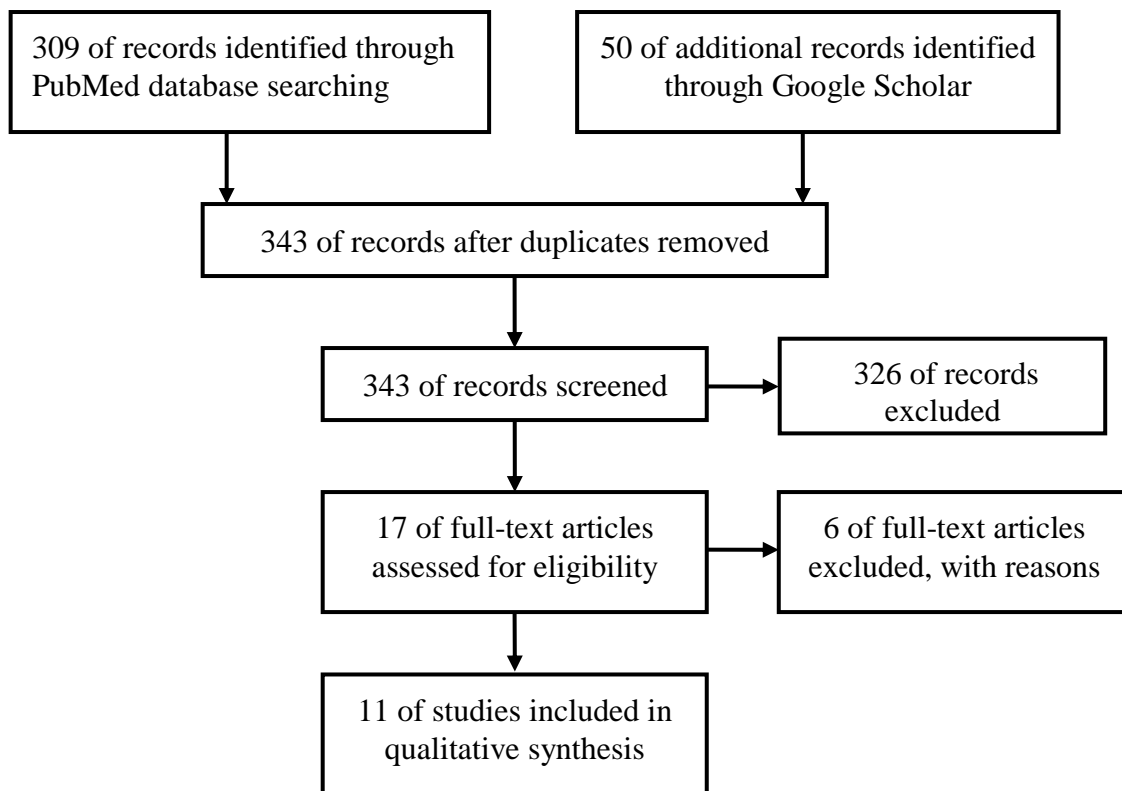

**Supplementary Figure S1.** PRISMA flow diagram.

Supplement: s1 [file s1]
